# Supplementary material for: Deriving the effect of wind speed on clean marine aerosol optical properties using the A-Train satellites
Source: Copernicus journal article supplement (doi:10.5194/acp-11-11401-2011), 2011-11-16
Supplement: Supplementary file 1 [file acp-11-11401-2011-supplement.pdf]

## Supplementary Online Material

Table S1. Latitude and longitude of 15 regions selected for the detailed analysis

| Region № | Latitude (deg) | Longitude (deg) |
|----------|----------------|-----------------|
| 1        | 48°S to 58°S   | 20°W to 31°W    |
| 2        | 48°S to 58°S   | 31°W to 43°W    |
| 3        | 48°S to 56°S   | 44°E to 64°E    |
| 4        | 47°S to 55°S   | 71°E to 91°E    |
| 5        | 5°S to 15°S    | 70°E to 83°E    |
| 6        | 55°S to 67°S   | 145°W to 159°W  |
| 7        | 25°S to 35°S   | 125°W to 135°W  |
| 8        | 46°S to 56°S   | 90°W to 100°W   |
| 9        | 20°S to 30°S   | 15°W to 25°W    |
| 10       | 30°N to 40°N   | 145°W to 159°W  |
| 11       | 5°S to 15°S    | 145°W to 159°W  |
| 12       | 5°S to 15°S    | 125°W to 135°W  |
| 13       | 15°N to 25°N   | 160°E to 178°E  |
| 14       | 45°S to 55°S   | 125°W to 140°W  |
| 15       | 40°N to 50°N   | 15°W to 25°W    |

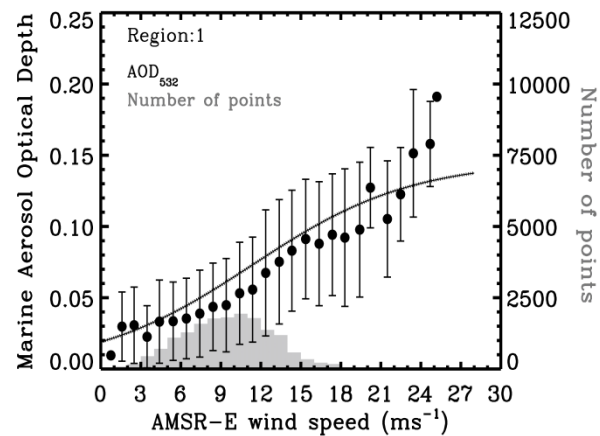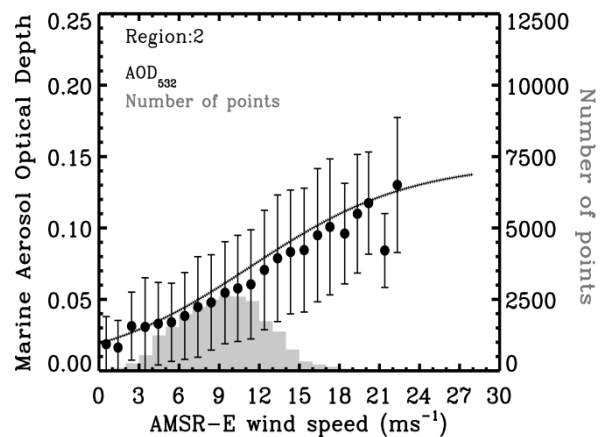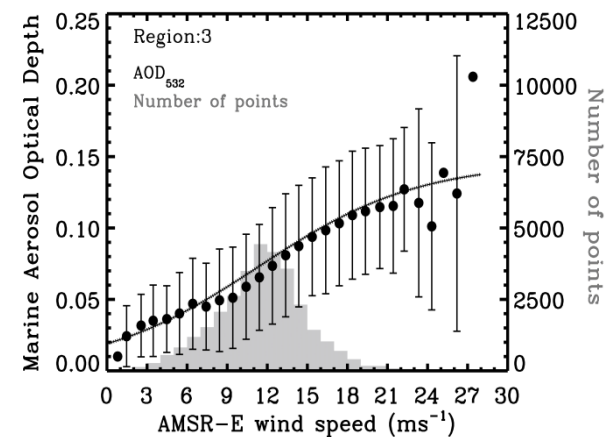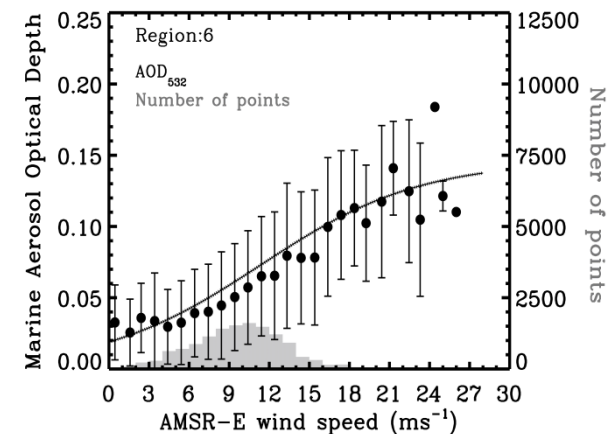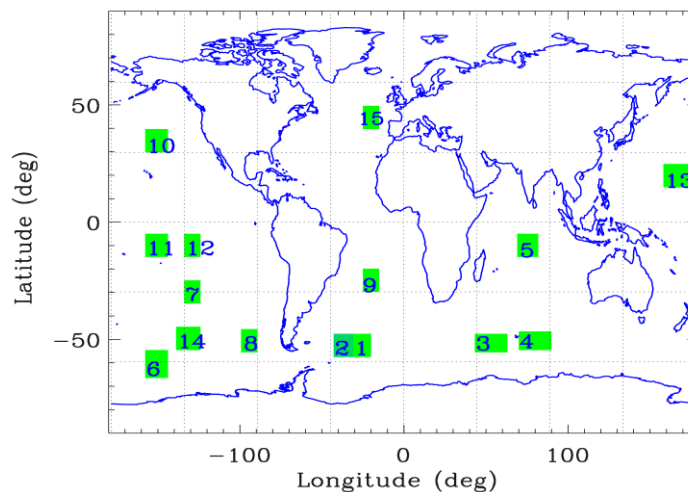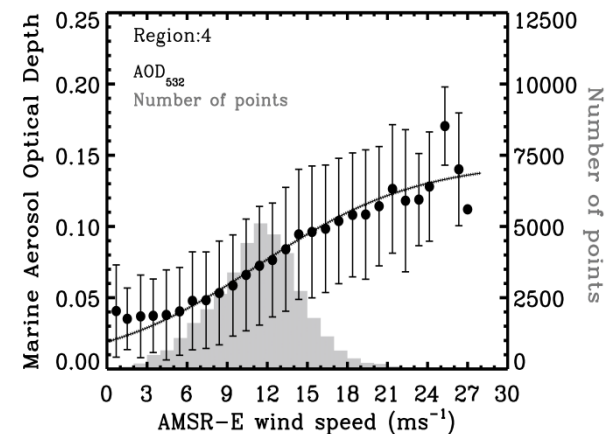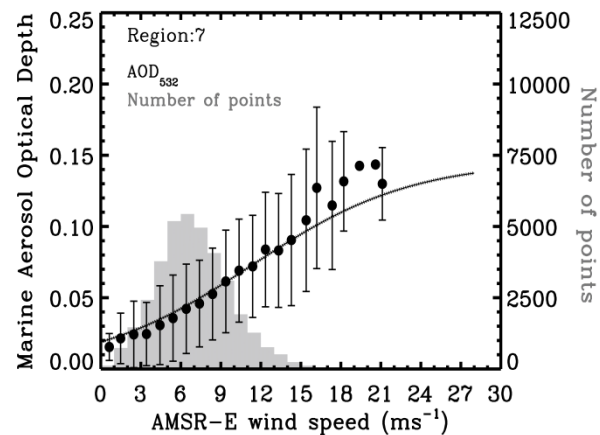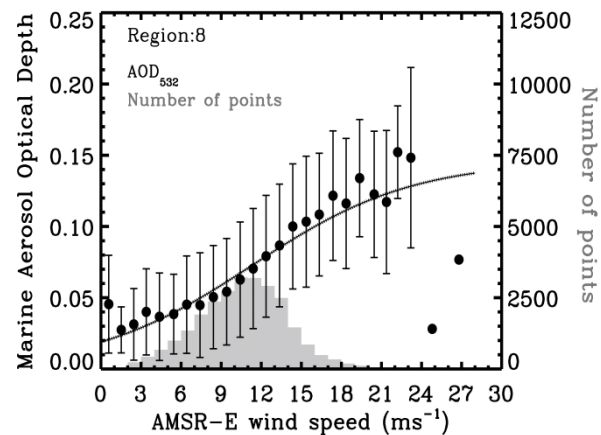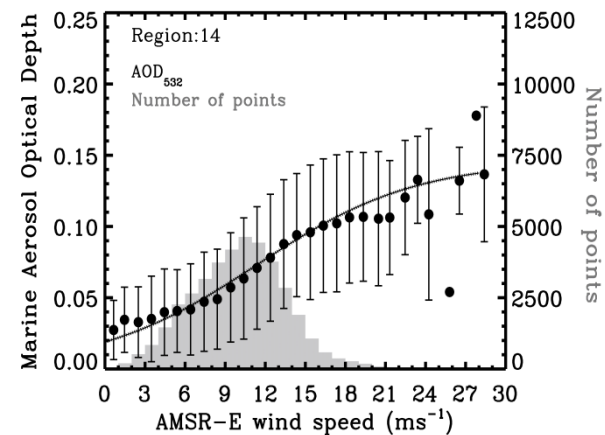

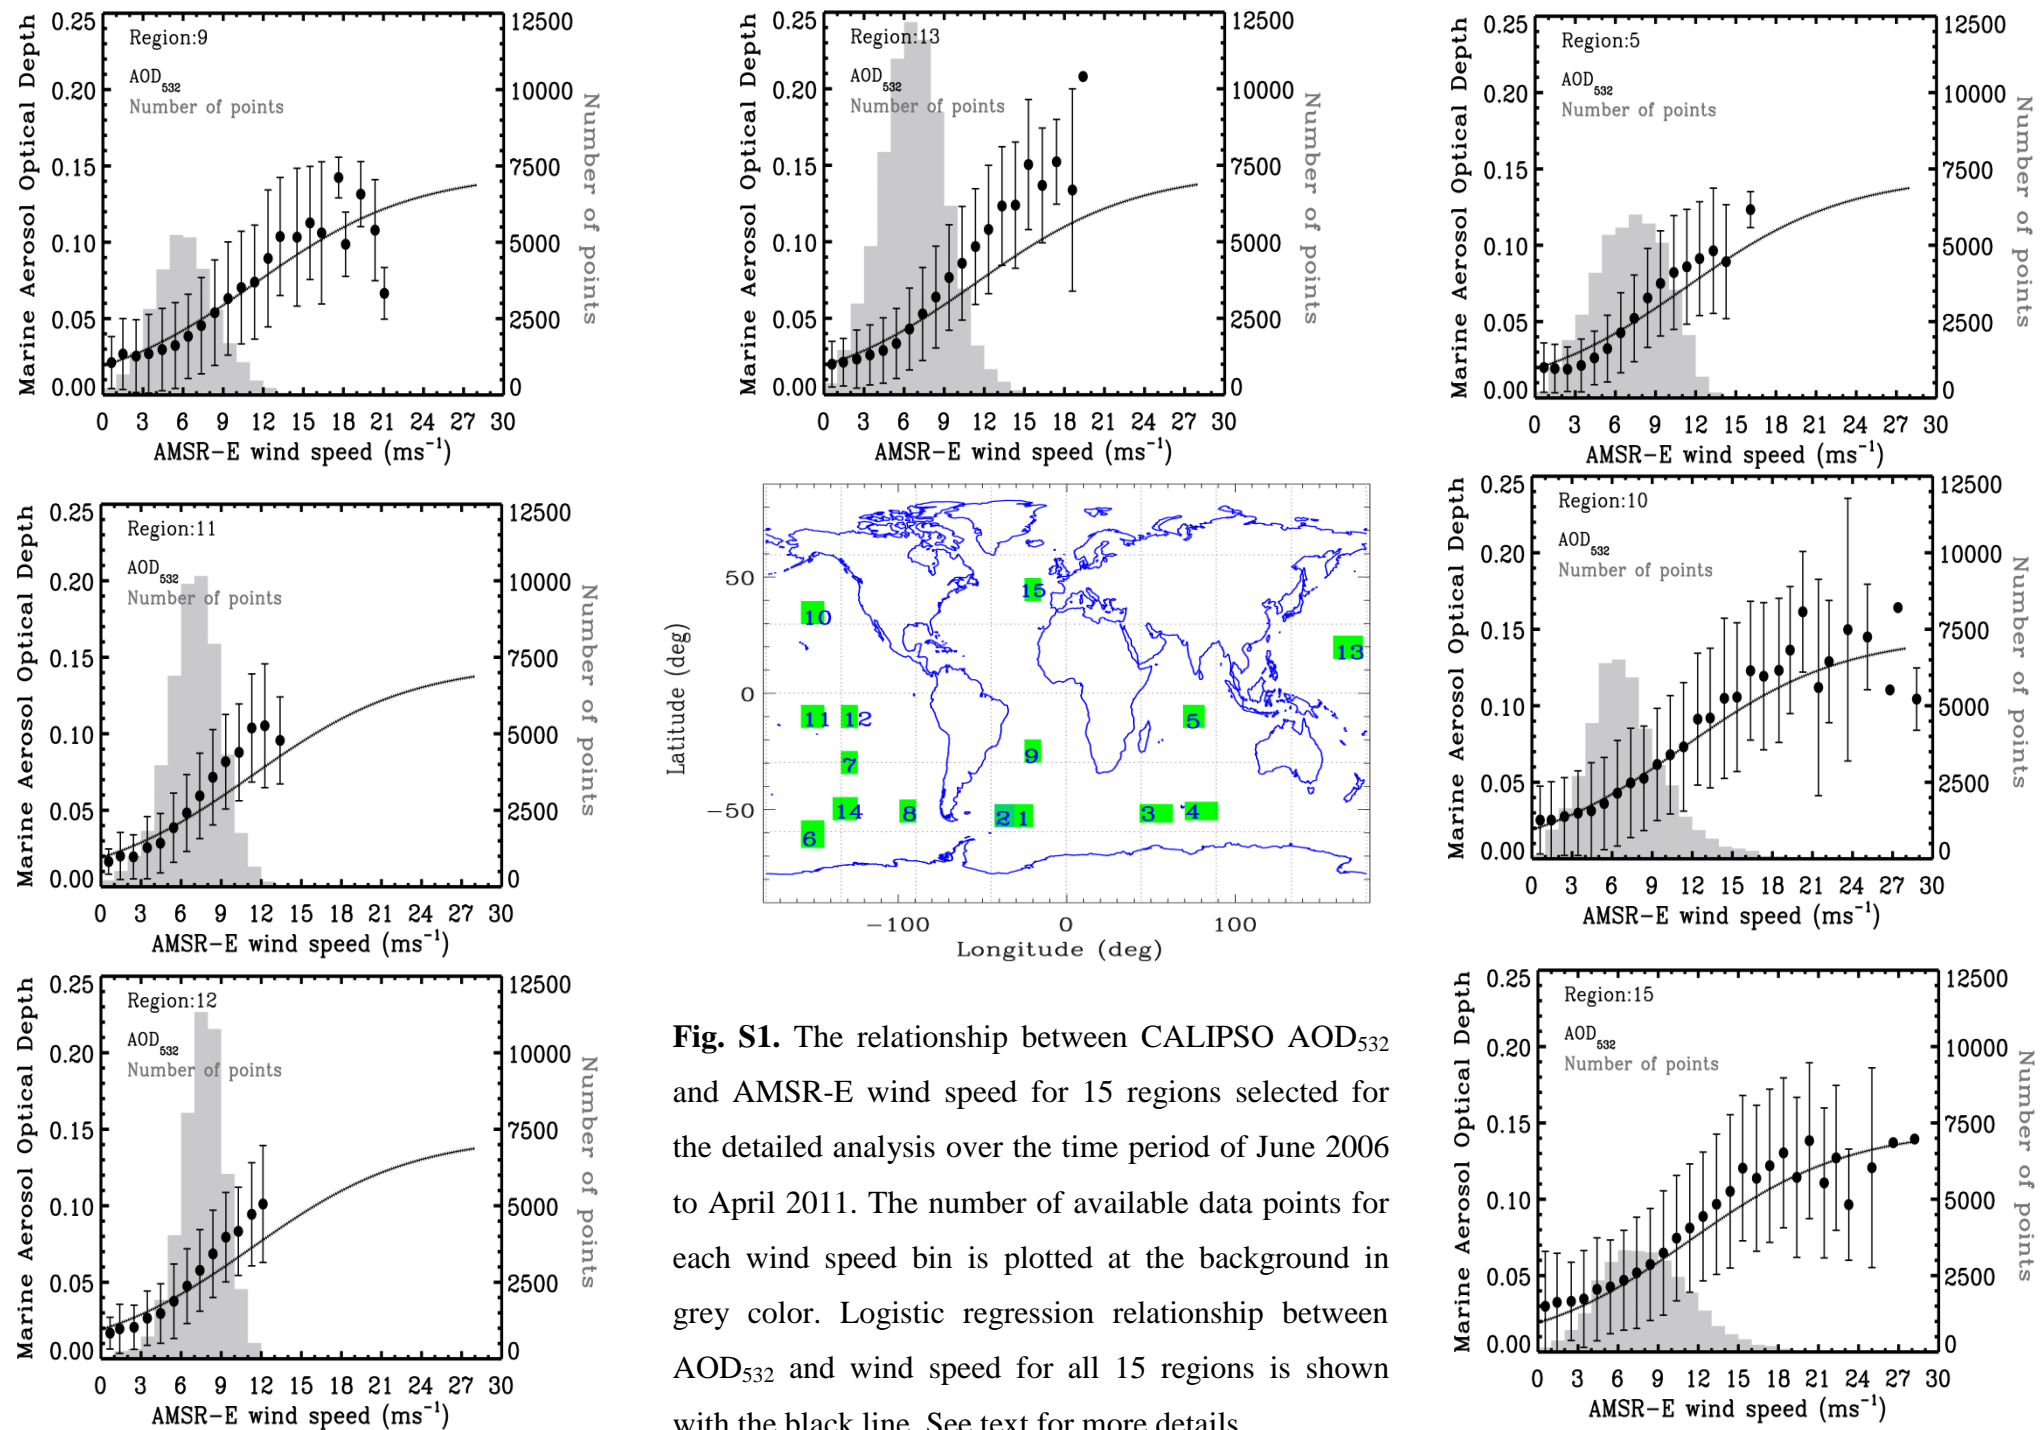

**Fig. S1.** The relationship between CALIPSO AOD<sub>532</sub> and AMSR-E wind speed for 15 regions selected for the detailed analysis over the time period of June 2006 to April 2011. The number of available data points for each wind speed bin is plotted at the background in grey color. Logistic regression relationship between AOD<sub>532</sub> and wind speed for all 15 regions is shown with the black line. See text for more details

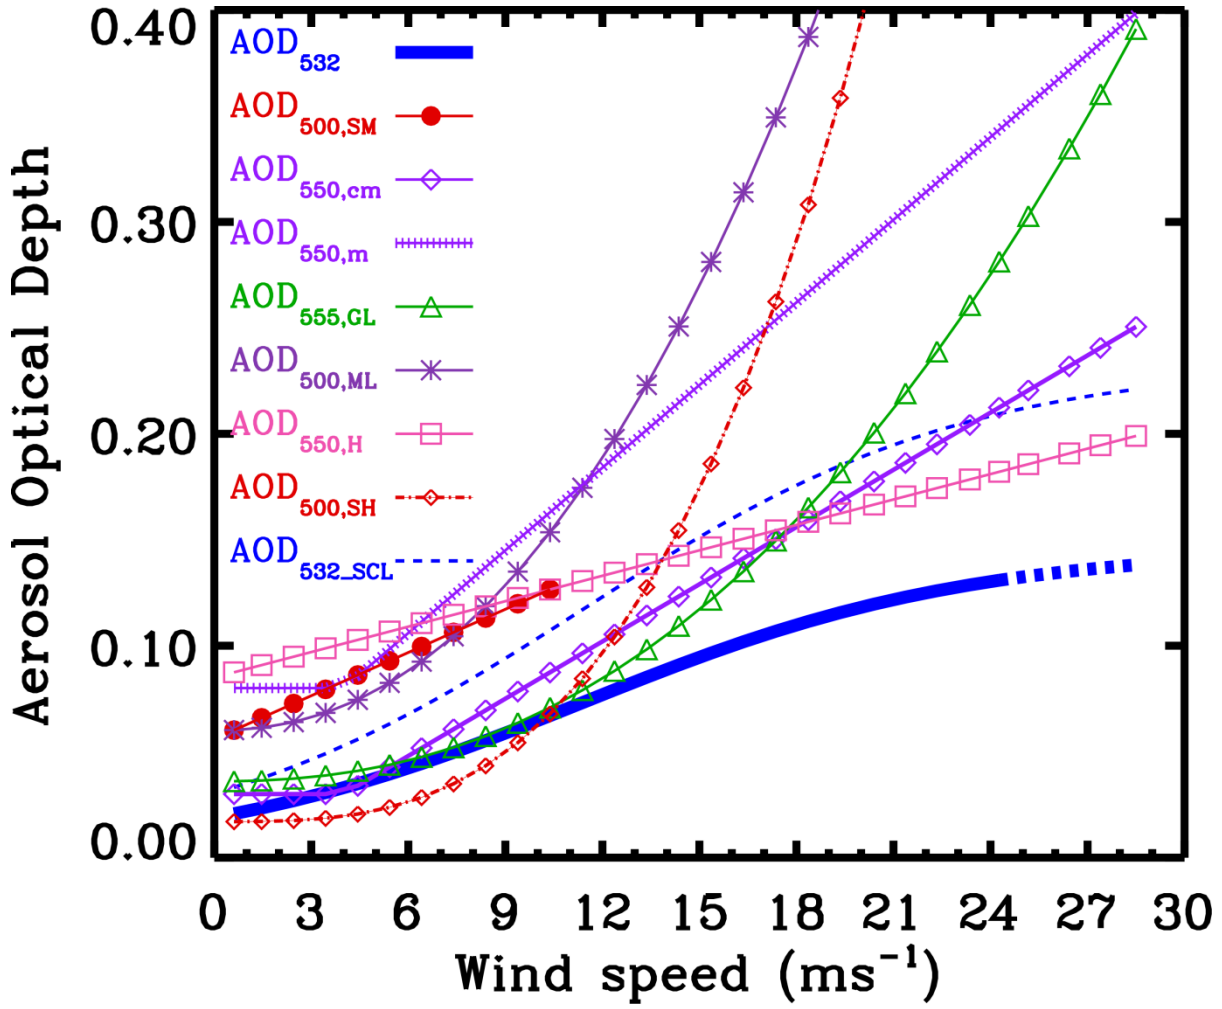

**Fig. S2.** Maritime aerosol optical depth as a function of wind speed. The regression statistics and the acronyms are summarized in Table 1. Thin dotted line shows CALIPSO-derived AOD (at 532 nm) with the lidar ratio of 34. See text for more details.
